# Supplementary material for: Opportunistic Salpingectomy at the Time of General Surgery Procedures: A Systematic Review and Narrative Synthesis of Current Knowledge
Source: MDPI journal article supplement (doi:10.3390/surgeries5020023), 2024-04-13
Supplement: s1 [file s1]

Table S1: MINORS assessment of included studies

| Criteria                                             | Bellamy 2017 | Bonavina 2020 | Hughes 2022 | Matsuo 2023 | Myriokefalitaki 2014 | Sagmeister 2023 | Tomascsh 2018 | Tomasch 2020 | Irons 2017 |
|------------------------------------------------------|--------------|---------------|-------------|-------------|----------------------|-----------------|---------------|--------------|------------|
| A clearly stated aim                                 | -            | -             | 2           | 2           | -                    | -               | 2             | 2            | 1          |
| Inclusion of consecutive patients                    | -            | -             | 1           | 1           | -                    | -               | 1             | 1            | 1          |
| Prospective collection of data                       | -            | -             | 1           | 1           | -                    | -               | 2             | 1            | 1          |
| Endpoints appropriate to the aim of the study        | -            | -             | 2           | 2           | -                    | -               | 2             | 2            | 2          |
| Unbiased assessment of the study endpoint            | -            | -             | 0           | 0           | -                    | -               | 2             | 1            | 1          |
| Follow-up period appropriate to the aim of the study | -            | -             | 0           | 0           | -                    | -               | 2             | 2            | 2          |
| Loss to follow up less than 5%                       | -            | -             | 0           | 0           | -                    | -               | 2             | 2            | 2          |
| Prospective calculation of the study size            | -            | -             | 0           | 0           | -                    | -               | 0             | 0            | 0          |
| An adequate control group                            | -            | -             | -           | -           | -                    | -               | -             | -            | -          |
| Contemporary groups                                  | -            | -             | -           | -           | -                    | -               | -             | -            | -          |
| Baseline equivalence of groups                       | -            | -             | -           | -           | -                    | -               | -             | -            | -          |
| Adequate statistical analyses                        | -            | -             | -           | -           | -                    | -               | -             | -            | -          |
| Total*                                               | -            | -             | 6           | 6           | -                    | -               | 13            | 11           | 9          |

†The items are scored 0 (not reported), 1 (reported but inadequate) or 2 (reported and adequate). The global ideal score being 16 for non-comparative studies and 24 for comparative studies.
